# Supplementary material for: Transcriptome analysis reveals the mechanism of improving erect-plant-type peanut yield by single-seeding precision sowing
Source: PeerJ. 2021 Feb 9;9:e10616. doi: 10.7717/peerj.10616 (PMC7879956; doi:10.7717/peerj.10616)
Supplement: Supplemental Information 6 [file peerj-09-10616-s006.xlsx]

## Sheet: Sheet1
Resveratrol contents (μg/g)
	Leaf		Root
DS	17.4698		24.5443
	18.3619		23.3805
	17.8635		21.1628
SS	13.62		29.1592
	14.3239		30.1505
	15.3039		31.2126
	SOD /(U·g-1FW)		POD /(△470·g-1)		CAT /(mg·g-1·min-1)		TTC (μg·g-1·FW·h-1)
SS	170.83		134.06		30.81		54.87
	169.59		130.21		31.73		58.49
	164.54		133.14		35.14		57.46
	168.32		132.47		32.56		56.94
DS	137.14		115.47		27.37		39.58
	135.64		109.52		23.42		44.35
	133.57		113.62		25.5		40.21
	135.45		112.87		25.43		41.38
	Root dry weight			Root dry weight
SS	1.65		DS	1.31
	1.3			1.1
	1.46			1.13
	1.47			1.18
	RT-PCR	RNA-seq				RT-PCR	RNA-seq
107489247	-4.98	-5.66			107476234	-4.68	-6.01
107469379	-6.24	-6.79			107482875	-2.45	-5.19
107464433	-8.2	-7.97			107474885	-1.41	-4.77
107461905	-3.99	-4.86			107494567	-3.65	-4.56
107493579	-3.22	-4.82			107465287	-1.87	-3.91
107463300	-1.97	-2.81			110273860	-4.66	-3.59
110279369	7.34	6.13			107479532	-1.53	-2.66
107472740	5.45	4.88			107460667	5.53	6.68
107463237	3.76	4.91			107488919	3.73	5.28
110274631	3.43	2.1			107489790	2.62	4.69
107467989	2.24	2.04			107492649	1.55	3.98
107477292	1.45	1.58			107464364	2.59	2.25
